# Supplementary material
Source: Springer Nature journal article supplement (https://www.springermedizin.de/resource/supplementary/12943_2013_1159_MOESM1_ESM.pdf/9552634)

**A**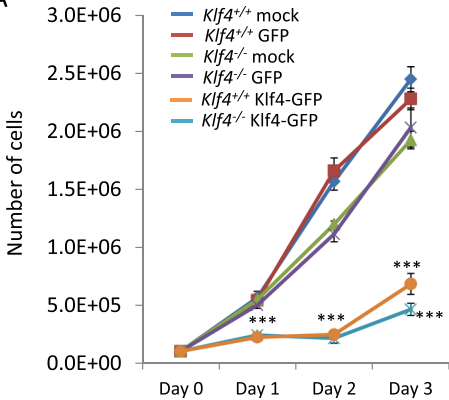**B**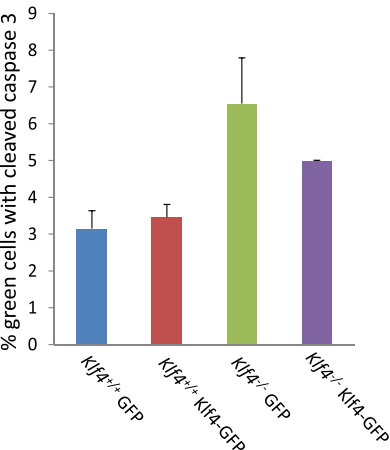**C**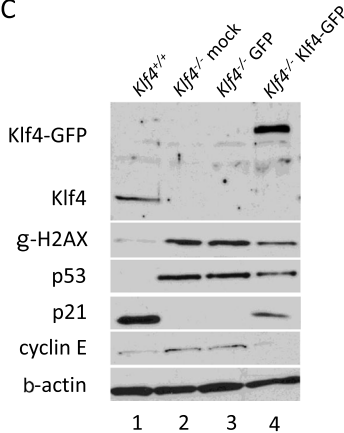

Supplement: MOESM1 [file 9552634]
